# Supplementary material for: Extent of linkage disequilibrium and effective population size of the Landrace population in Korea
Source: PubMed Central journal article supplement — Asian-Australas J Anim Sci. 2018 Mar 13;31(8):1078–87. doi: 10.5713/ajas.17.0237 (PMC6043435; doi:10.5713/ajas.17.0237), 2018-03-13

## **Supplementary material**

### **Title:**

**Extent of linkage disequilibrium and effective population size of the Landrace population in Korea**

### **Authors Information:**

Donghyun Shin<sup>1</sup>, Sung-Hoon Kim<sup>2</sup>, Joowan Park<sup>3</sup>, Hak-Kyo Lee<sup>1,4\*</sup>, Ki-Duk Song<sup>1,4\*</sup>

### **\*Corresponding Authors:**

#### **Ki-Duk Song**

Tel: +82-63-219-5523, Fax: +82-63-270-5937; E-mail: kiduk.song@gmail.com

#### **Hak-Kyo Lee**

Tel: +82-63-270-4748, Fax: +82-63-270-2614; E-mail: breedlee@empas.com

<sup>1</sup>Department of Animal Biotechnology, Chonbuk National University, Jeonju, 54896, Republic of Korea,

<sup>2</sup>PigGene Korea Inc., Yongin, 16866, Republic of Korea, <sup>3</sup>Sunjin Co. LTD, Seoul, 05372, <sup>4</sup>The Animal Molecular

Genetics and Breeding Center, Chonbuk National University, Jeonju, 54896, Republic of Korea

Supplementary Table 01. Distance classes and bin ranges for the linkage disequilibrium summary

| Class | Minimum distance (Mb) | Maximum distance (Mb) | Within class bin distance range (Mb) | No of bins |
|-------|-----------------------|-----------------------|--------------------------------------|------------|
| 1     | 0                     | 0.5                   | 0.01                                 | 50         |
| 2     | 0                     | 5                     | 0.1                                  | 50         |

Supplementary Table 02. Chromosome-specific centimorgan to megabase (cM/Mb) conversion ratios

| Chromosome | Length (Mb) | Length (cM) | cM/Mb ratio |
|------------|-------------|-------------|-------------|
| 1          | 315         | 130         | 0.413       |
| 2          | 163         | 110         | 0.675       |
| 3          | 145         | 113         | 0.779       |
| 4          | 143         | 111         | 0.776       |
| 5          | 112         | 97          | 0.866       |
| 6          | 158         | 122         | 0.772       |
| 7          | 135         | 117         | 0.867       |
| 8          | 148         | 110         | 0.743       |
| 9          | 154         | 117         | 0.76        |
| 10         | 79          | 99          | 1.253       |
| 11         | 88          | 77          | 0.875       |
| 12         | 64          | 86          | 1.344       |
| 13         | 219         | 97          | 0.443       |
| 14         | 154         | 110         | 0.714       |
| 15         | 158         | 97          | 0.614       |
| 16         | 87          | 78          | 0.897       |
| 17         | 70          | 67          | 0.957       |
| 18         | 61          | 59          | 0.967       |
| Total      | 2,453       | 1,797       | -           |

Supplementary Table 03. Description of the generation binning process

| Generation range applied to | Number of generations represented by each bin | Number of bins | Example for first bin |                  |                                        |
|-----------------------------|-----------------------------------------------|----------------|-----------------------|------------------|----------------------------------------|
|                             |                                               |                | Generation            | Generation range | Corresponding distance range (Morgans) |
| 10–100                      | 10                                            | 10             | 10                    | 5–15             | 0.033–0.1                              |
| 200–1,000                   | 100                                           | 9              | 200                   | 150–250          | 0.002–0.003                            |
| 2,000–10,000                | 1,000                                         | 9              | 2,000                 | 1,500–2,500      | 0.0002–0.0003                          |
| 20,000–100,000              | 10,000                                        | 9              | 20,000                | 15,000–25,000    | 0.00002–0.00003                        |

Supplementary Table 04. Average linkage disequilibrium (LD) on different autosomal chromosomes for single nucleotide polymorphisms (SNPs) separated by 50 kb and 5 Mb

| Chromosome | Less than 50 kb between two SNPs |                | Less than 5Mb between two SNPs |                |
|------------|----------------------------------|----------------|--------------------------------|----------------|
|            | n                                | r <sup>2</sup> | n                              | r <sup>2</sup> |
| 1          | 3,794                            | 0.494          | 329,061                        | 0.204          |
| 2          | 2,641                            | 0.413          | 213,589                        | 0.145          |
| 3          | 1,884                            | 0.447          | 157,550                        | 0.130          |
| 4          | 2,460                            | 0.424          | 225,339                        | 0.127          |
| 5          | 1,470                            | 0.379          | 118,795                        | 0.101          |
| 6          | 2,689                            | 0.427          | 201,570                        | 0.142          |
| 7          | 2,296                            | 0.427          | 211,486                        | 0.143          |
| 8          | 1,858                            | 0.396          | 155,635                        | 0.109          |
| 9          | 2,584                            | 0.400          | 202,953                        | 0.134          |
| 10         | 1,297                            | 0.409          | 109,590                        | 0.099          |
| 11         | 1,252                            | 0.398          | 114,606                        | 0.115          |
| 12         | 1,375                            | 0.398          | 97,573                         | 0.101          |
| 13         | 2,558                            | 0.459          | 225,620                        | 0.181          |
| 14         | 2,709                            | 0.500          | 260,080                        | 0.219          |
| 15         | 1,776                            | 0.454          | 140,231                        | 0.125          |
| 16         | 1,182                            | 0.428          | 101,244                        | 0.124          |
| 17         | 1,164                            | 0.390          | 99,870                         | 0.109          |
| 18         | 1,036                            | 0.435          | 88,739                         | 0.104          |
| Total      | 36,025                           | 0.434          | 3,053,531                      | 0.145          |

Supplementary Figure 01. Average estimated effective population size versus previous generations, truncated at 100 generations using r2.

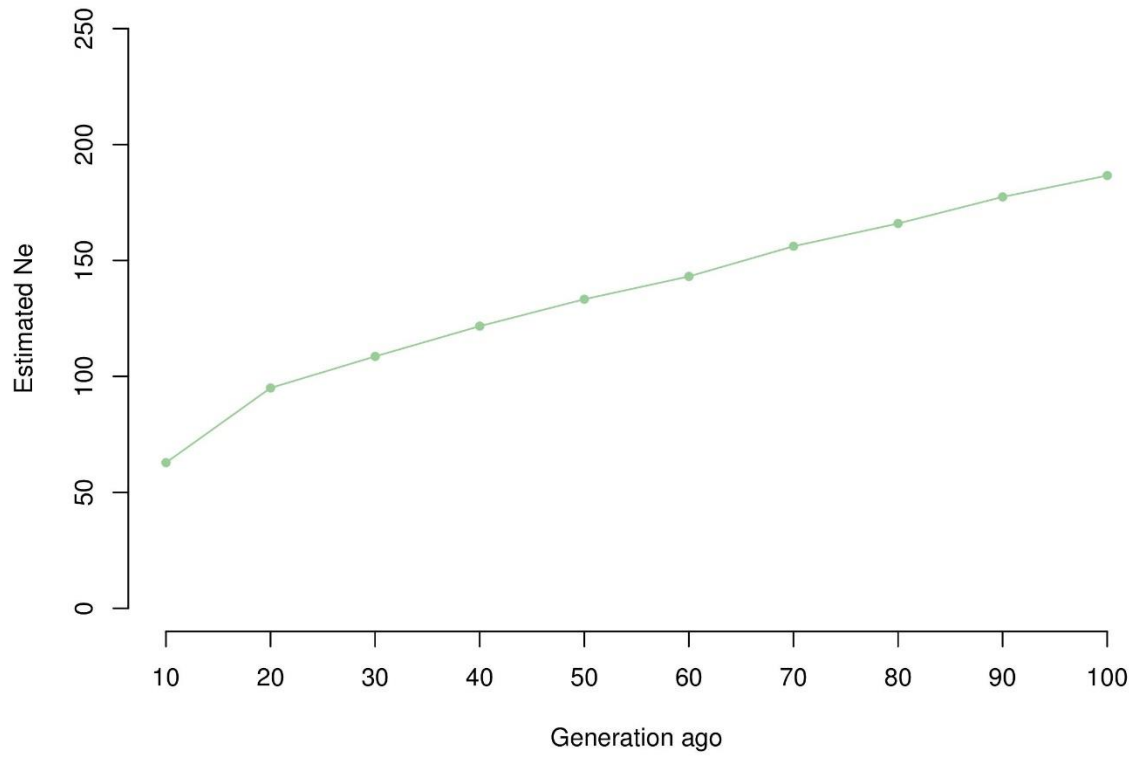

Supplementary Figure 02. Average linkage disequilibrium versus the median of the distance bin range (Mb) per chromosome.

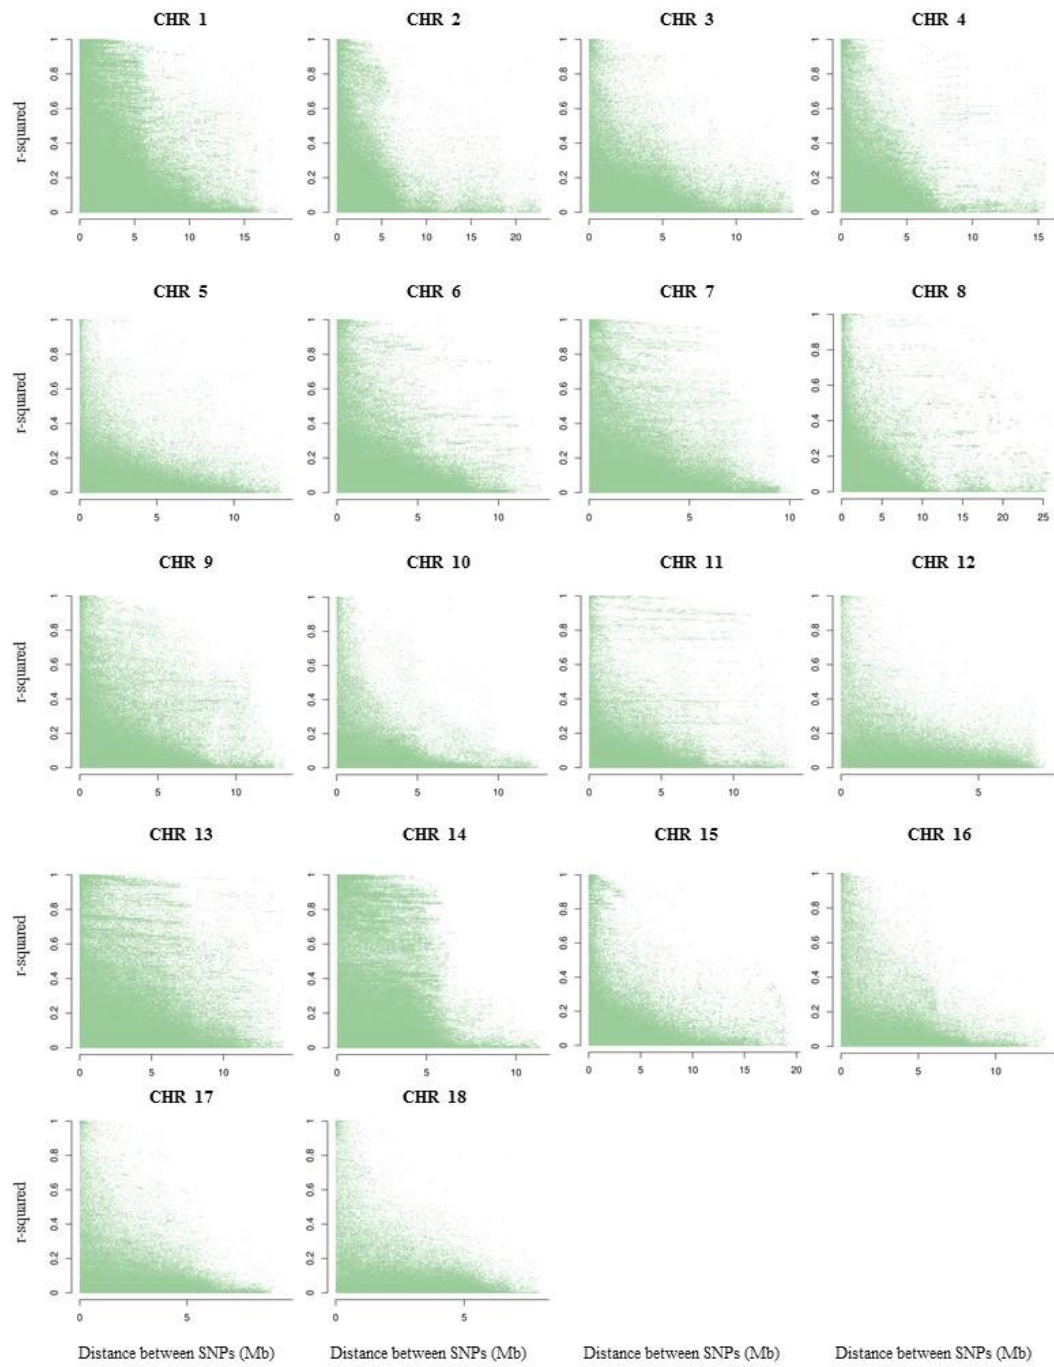

Supplementary Figure 03. Approximate purebred pig (Landrace) production system at each Korean grand-grandparent farm.

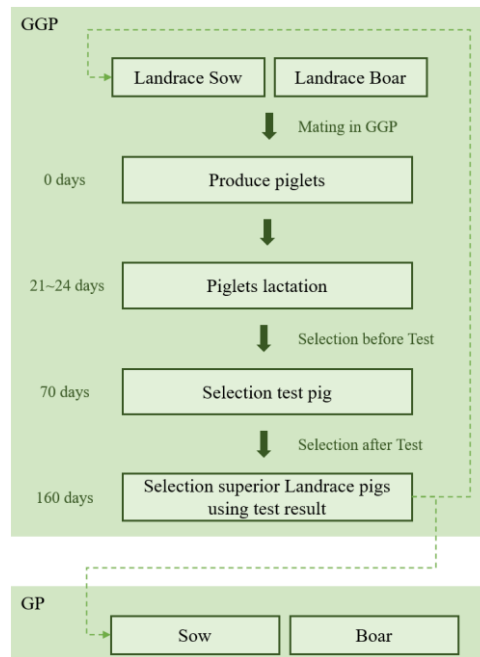



Supplementary Figure 04. Histogram of distances between single nucleotide polymorphism (SNP) pairs used to estimate linkage disequilibrium.

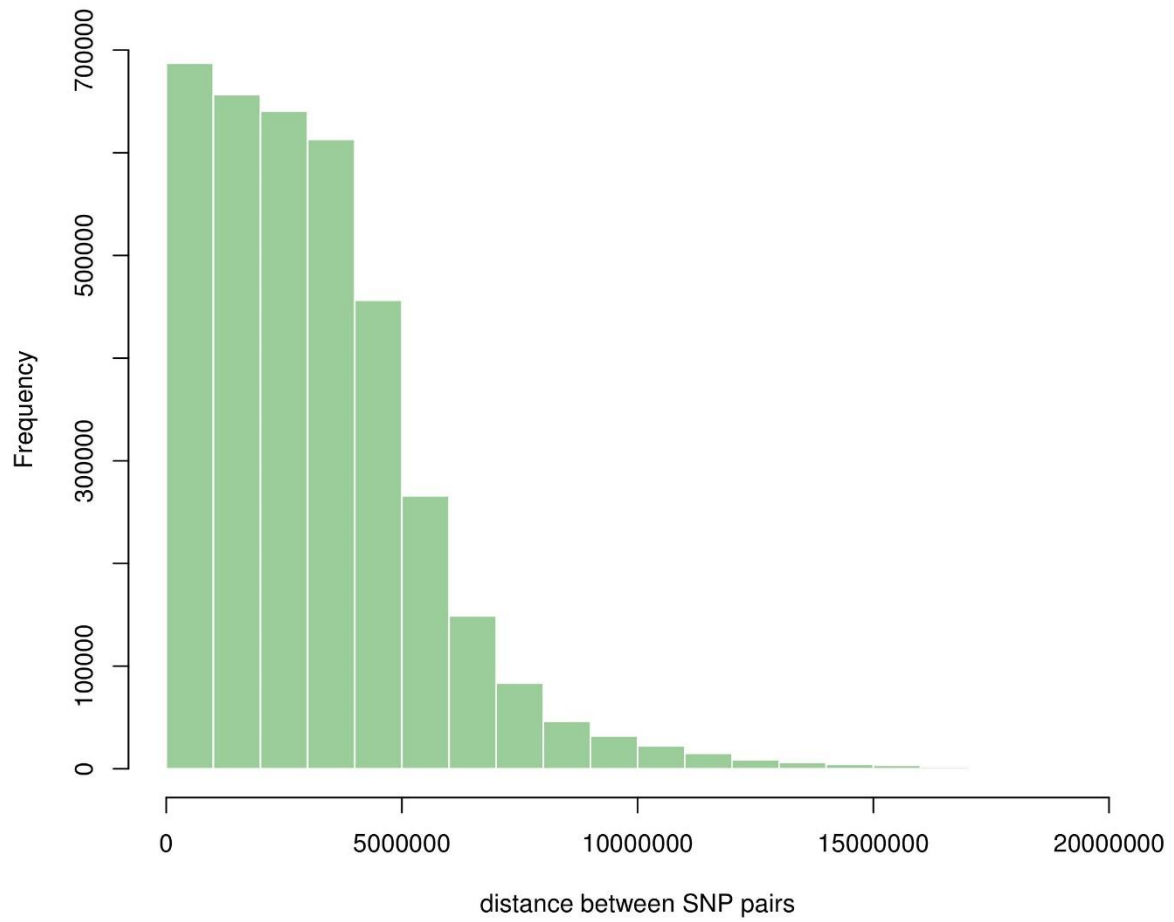

Supplementary Figure 05. Number of breeding pigs in the trait test systems of Korean grand-grandparent or grandparent farms per year (Provided by the Korea Animal Improvement Association).

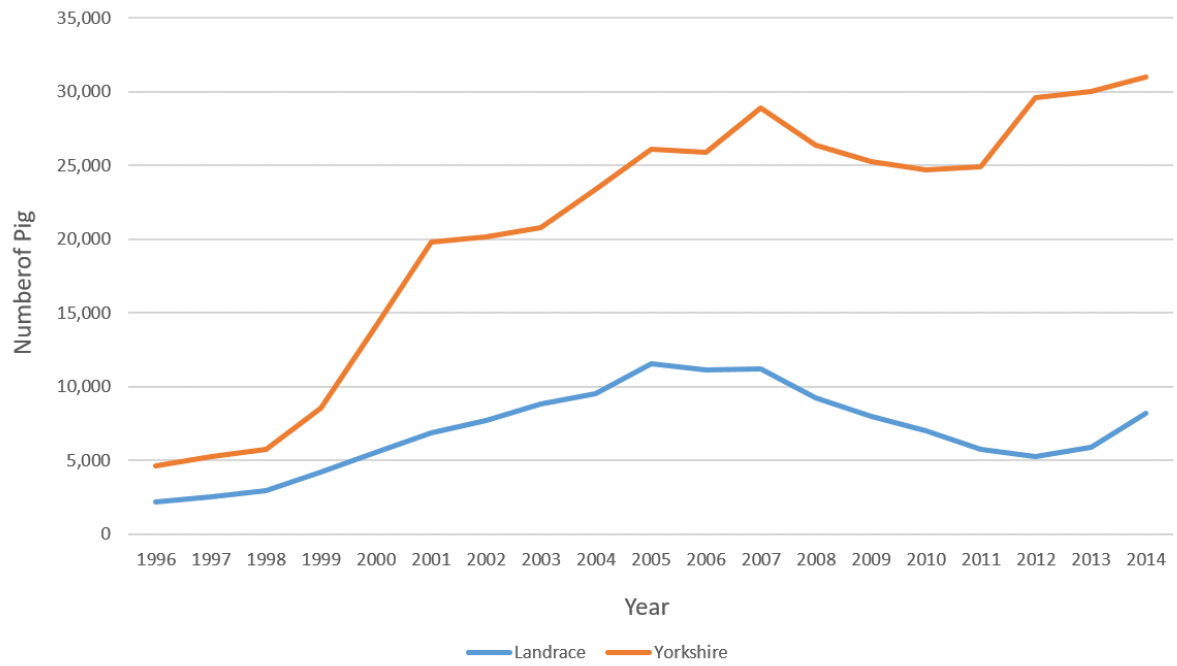

Supplementary Figure 06. Number of breeding pigs imported by Korean grand-grandparent or grandparent farms per year (Provided by the Korea Animal Improvement Association).

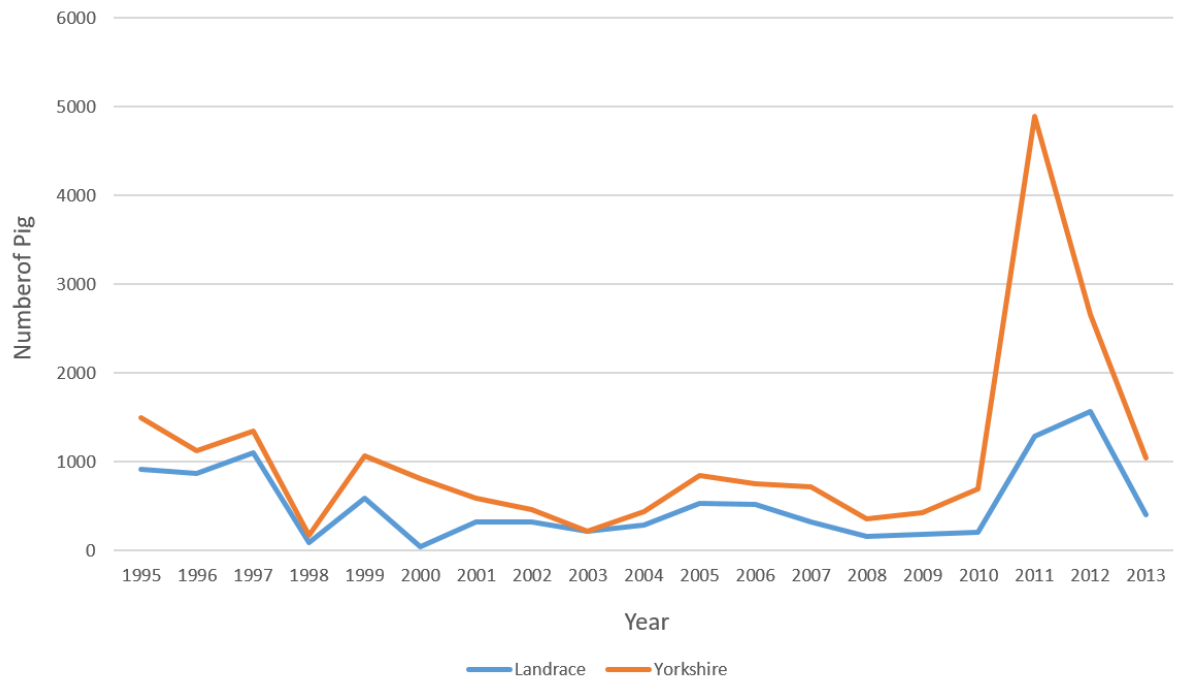

Supplement: ajas-31-8-1078-supplementary.pdf [file ajas-31-8-1078-supplementary.pdf]
